# Supplementary material
Source: PubMed Central journal article supplement (PMC7403606)
Supplement: NIHMS1610356-supplement-author_relationships.pdf [file NIHMS1610356-supplement-author_relationships.pdf]

**Author Relationships With Industry and Other Entities (Comprehensive)—2018**

**AHA/ACC/AACVPR/AAPA/ABC/ACPM/ADA/AGS/APhA/ASPC/NLA/PCNA Guideline on the Management of Blood Cholesterol (August 2018)**

| <b>Committee Member</b>    | <b>Employment</b>                                                                                                                                                                     | <b>Consultant</b>           | <b>Speakers Bureau</b> | <b>Ownership/ Partnership/ Principal</b> | <b>Salary</b> | <b>Personal Research</b> | <b>Institutional, Organizational, or Other Financial Benefit</b>                                 | <b>Expert Witness</b> |
|----------------------------|---------------------------------------------------------------------------------------------------------------------------------------------------------------------------------------|-----------------------------|------------------------|------------------------------------------|---------------|--------------------------|--------------------------------------------------------------------------------------------------|-----------------------|
| Scott M. Grundy<br>(Chair) | University of Texas Southwestern Medical Center at Dallas—Professor of Internal Medicine                                                                                              | None                        | None                   | None                                     | None          | None                     | None                                                                                             | None                  |
| Neil J. Stone (Vice Chair) | Northwestern Medical Faculty Foundation—Bonow Professor of Medicine, Cardiology                                                                                                       | None                        | None                   | None                                     | None          | None                     | None                                                                                             | None                  |
| Alison L. Bailey§          | Erlanger Health System/ University of Tennessee College of Medicine— Program Director, Cardiovascular Diseases Fellowship; Director, Preventive cardiology and Cardiac Rehabilitation | None                        | None                   | None                                     | None          | None                     | • AACVPR†<br> | None                  |
| Craig Beam                 | CBRE Group, Inc—Managing Director; National Cultivation/ Strategic Investments Leader                                                                                                 | None                        | None                   | None                                     | None          | None                     | None                                                                                             | None                  |
| Kim K. Birtcher            | University of Houston College of Pharmacy— Clinical Professor                                                                                                                         | • Jones & Bartlett Learning | None                   | None                                     | • Walgreens*  | None                     | • ACCL†                                                                                          | None                  |
| Roger S. Blumenthal        | Johns Hopkins University, Ciccarone Center for the Prevention of Heart Disease—Professor of Medicine                                                                                  | None                        | None                   | None                                     | None          | None                     | None                                                                                             | None                  |
| Lynne T. Braun             | Rush University Medical Center—Professor of Nursing and Medicine                                                                                                                      | • Medscape                  | None                   | None                                     | None          | None                     | • AHA†<br>• PCNA (Trustee)†                                                                      | None                  |

|                          |                                                                                                                            |                                                                               |      |      |      |                                                                                                                                                                                                                       |                                                                                                                                |      |
|--------------------------|----------------------------------------------------------------------------------------------------------------------------|-------------------------------------------------------------------------------|------|------|------|-----------------------------------------------------------------------------------------------------------------------------------------------------------------------------------------------------------------------|--------------------------------------------------------------------------------------------------------------------------------|------|
| Sarah de Ferranti        | Boston Children’s Hospital—<br>Assistant Professor of<br>Pediatrics                                                        | • UpToDate*                                                                   | None | None | None | <ul style="list-style-type: none"> <li>• New England Congenital Cardiology Association*</li> <li>• AHA†</li> <li>• Pediatric Heart Network—DOIT Trial* (Co-PI)</li> <li>• Duke Clinical Research Institute</li> </ul> | • HALO-FH‡                                                                                                                     | None |
| Joseph Faiella-Tommasino | Touro College, School of Health Sciences—Chairman and Assistant Dean of Physician Assistant Programs                       | None                                                                          | None | None | None | None                                                                                                                                                                                                                  |                                             | None |
| Daniel E. Forman         | University of Pittsburgh—<br>Chair, Geriatric Cardiology                                                                   | None                                                                          | None | None | None | None                                                                                                                                                                                                                  | None                                                                                                                           | None |
| Ronald Goldberg          | University of Miami, Diabetes Research Institute—Professor of Medicine, Division of Endocrinology, Metabolism and Diabetes | • Clearwater Healthcare                                                       | None | None | None | • NIH*                                                                                                                                                                                                                | None                                                                                                                           | None |
| Paul A. Heidenreich      | Stanford University, Department of Medicine—<br>Professor, Vice Chair for Quality                                          | None                                                                          | None | None | None | None                                                                                                                                                                                                                  | • Bracco Diagnostics                                                                                                           | None |
| Mark A. Hlatky           | Stanford University, School of Medicine—Professor of Health Research Policy, Professor of Cardiovascular Medicine          | <ul style="list-style-type: none"> <li>• Acumen*</li> <li>• BC/BS*</li> </ul> | None | None | None | <ul style="list-style-type: none"> <li>• Heartflow*</li> <li>• Milestone Pharmaceutical*</li> <li>• NHLBI (DSMB)</li> <li>• St. Jude Medical</li> </ul>                                                               | <ul style="list-style-type: none"> <li>• George Institute</li> <li>• JACC (Editor)</li> <li>• Sanofi-aventis (CAEC)</li> </ul> | None |

|                     |                                                                                                                                                     |                                                                |      |                                                                    |      |                                                                                                                                                   |                                                                                                                                              |      |
|---------------------|-----------------------------------------------------------------------------------------------------------------------------------------------------|----------------------------------------------------------------|------|--------------------------------------------------------------------|------|---------------------------------------------------------------------------------------------------------------------------------------------------|----------------------------------------------------------------------------------------------------------------------------------------------|------|
| Daniel W. Jones     | University of Mississippi Medical Center—Professor of Medicine and Physiology; Director, Clinical and Population Science                            | None                                                           | None | None                                                               | None | None                                                                                                                                              | None                                                                                                                                         | None |
| Donald Lloyd-Jones  | Northwestern University—Eileen M. Foell Professor; Chair, Department of Preventive Medicine                                                         | None                                                           | None | None                                                               | None | None                                                                                                                                              | <ul style="list-style-type: none"> <li>• AHA (Trustee)†</li> <li>• JAMA Cardiology (Editor)</li> </ul>                                       | None |
| Nuria Lopez-Pajares | Temple University—Physician                                                                                                                         | None                                                           | None | None                                                               | None | None                                                                                                                                              | None                                                                                                                                         | None |
| Chiadi E. Ndumele   | Johns Hopkins University School of Medicine—Robert E. Meyerhoff Assistant Professor of Medicine                                                     | None                                                           | None | None                                                               | None | None                                                                                                                                              | None                                                                                                                                         | None |
| Carl E. Orringer    | University of Miami, Miller School of Medicine—Associate Professor of Medicine                                                                      | None                                                           | None | None                                                               | None | None                                                                                                                                              |  <ul style="list-style-type: none"> <li>• NLA*</li> </ul> | None |
| Carmen A. Peralta   | UCSF—Associate Professor of Medicine; Kidney Health Research Collaborative—Executive Director; VA—Physician                                         | <ul style="list-style-type: none"> <li>• Vital Labs</li> </ul> | None | <ul style="list-style-type: none"> <li>• Cricket Health</li> </ul> | None | <ul style="list-style-type: none"> <li>• AHA</li> <li>• Campini Foundation*</li> <li>• NIH*</li> <li>• Robert Wood Johnson Foundation*</li> </ul> | <ul style="list-style-type: none"> <li>• ASN†</li> <li>• NKF†</li> <li>• UCSF Renal Grand Rounds (Chair)†</li> </ul>                         | None |
| Joseph Saseen       | University of Colorado, Anschutz Medical Campus—Professor and Vice Chair, Department of Clinical Pharmacy; Professor, Department of Family Medicine | None                                                           | None | None                                                               | None | None                                                                                                                                              | <ul style="list-style-type: none"> <li>• NLA†</li> <li>• ACCL†</li> </ul>                                                                    | None |
| Sidney C. Smith, Jr | University of North Carolina, Chapel Hill—Professor of Medicine                                                                                     | None                                                           | None | None                                                               | None | None                                                                                                                                              | None                                                                                                                                         | None |

|                      |                                                                                                                                                                  |      |      |      |      |                                                                                         |                                                                                         |      |
|----------------------|------------------------------------------------------------------------------------------------------------------------------------------------------------------|------|------|------|------|-----------------------------------------------------------------------------------------|-----------------------------------------------------------------------------------------|------|
| Laurence S. Sperling | Emory University, Rollins School of Public Health— Professor of Medicine, Cardiology; Professor of Global Health                                                 | None | None | None | None | None                                                                                    | None                                                                                    | None |
| Salim S. Virani      | Baylor College of Medicine, Texas Medical Center— Associate Professor, Section of Cardiovascular Research; Associate Director for Research VA—Staff Cardiologist | None | None | None | None | <ul style="list-style-type: none"> <li>• ADA*</li> <li>• AHA*</li> <li>• VA*</li> </ul> | <ul style="list-style-type: none"> <li>• ACC*</li> <li>• DCRI</li> <li>• NLA</li> </ul> | None |
| Francine Welty ††    | Harvard Medical School — Associate Professor of Medicine                                                                                                         | None | None | None | None | <ul style="list-style-type: none"> <li>• Boehringer-Ingelheim (DSMB)*</li> </ul>        | None                                                                                    | None |
| Joseph Yeboah        | Wake Forest Baptist Health—Associate Professor, Internal Medicine, Cardiovascular                                                                                | None | None | None | None | None                                                                                    | None                                                                                    | None |
| Michael D. Miedema   | Minneapolis Heart Institute                                                                                                                                      | None | None | None | None | None                                                                                    | None                                                                                    | None |

This table represents all relationships of committee members with industry and other entities that were reported by authors, including those not deemed to be relevant to this document, at the time this document was under development. The table does not necessarily reflect relationships with industry at the time of publication. A person is deemed to have a significant interest in a business if the interest represents ownership of  $\geq 5\%$  of the voting stock or share of the business entity, or ownership of  $\geq \$5,000$  of the fair market value of the business entity; or if funds received by the person from the business entity exceed 5% of the person's gross income for the previous year. Relationships that exist with no financial benefit are also included for the purpose of transparency. Relationships in this table are modest unless otherwise noted. Please refer to <http://www.acc.org/guidelines/about-guidelines-and-clinical-documents/relationships-with-industry-policy> for definitions of disclosure categories or additional information about the ACC/AHA Disclosure Policy for Writing Committees.

\*Significant relationship.

†No financial benefit.

‡This disclosure was entered under the Clinical Trial Enroller category in the ACC's disclosure system. To appear in this category, the author acknowledges that there is no direct or institutional relationship with the trial sponsor as defined in the ACC/AHA Disclosure Policy for Writing Committees.

§CMS reported payments to Dr. Bailey in 2016. Dr. Bailey has established that the study she participated in ended in 2015.

|| On May 10, 2018 a writing committee member discussed their participation in an industry-supported, multicenter study, which they had thought was not relevant to this prevention guideline. However, when this was reviewed using specific ACC/AHA criteria, it was considered to represent a relevant relationship with industry. Given the current

policy that a prevention guideline writing committee member must be free of any relevant relationships with industry, this member was removed from the committee. The 2 sections authored by the writing committee member were removed and replaced by new material written by the guideline chairs, and the revised sections were reviewed and approved by all remaining writing committee members. The writing committee member did not participate in any further guideline discussions or review of the manuscript or recommendations.

AACVPR indicates American Association of Cardiovascular and Pulmonary Rehabilitation; AAPA, American Academy of Physician Assistants; ABC, Association of Black Cardiologists; ACC, American College of Cardiology; ACCL, Accreditation Council for Clinical Lipidology; ACPM, American College of Preventive Medicine; ADA, American Diabetes Association; AGS, American Geriatrics Society; AHA, American Heart Association; AHRQ, Agency for Healthcare Research and Quality; APhA, American Pharmacists Association; ASN, American Society of Nephrology; ASPC, American Society for Preventive Cardiology; BC/BS, Blue Cross/Blue Shield; CAEC, Clinical Adjudication Events Committee; CMS, Centers for Medicare and Medicaid Services; DCRI, Duke Clinical Research Institute; DOIT, Dyslipidemia and Obesity In Teens; DSMB, Data Safety Monitoring Board; HALO-FH, HDL Acute Lipid Optimization In Homozygous Familial Hypercholesterolemia; *JACC, Journal of the American College of Cardiology*; *JAMA, Journal of the American Medical Association*; NHLBI, National Heart, Lung, and Blood Institute; NIH, National Institutes of Health; NKF, National Kidney Foundation; NLA, National Lipid Association; PCNA, Preventive Cardiovascular Nurses Association; PI, principal investigator; PCORI, Patient-Centered Outcomes Research Institute; REDUCE-IT, Reduction of Cardiovascular Events Outcomes ; UCSF, University of California, San Francisco; and VA, Veterans Affairs.

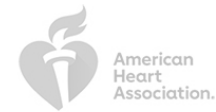

# Circulation
